# Supplementary material for: Porous organic polymers for electrocatalysis
Source: Royal Society of Chemistry journal article supplement (doi:10.1039/d1cs00887k), 2022-01-01
Supplement: d1cs00887k1.pdf [file d1cs00887k1.pdf]

*Electronic Supplementary Information*

## **Porous organic polymers for electrocatalysis**

Dong-Hui Yang, You Tao, Xuesong Ding,\* Bao-Hang Han\*

*CAS Key Laboratory of Nanosystem and Hierarchical Fabrication, CAS  
Center for Excellence in Nanoscience, National Center for Nanoscience  
and Technology, Beijing 100190, China*

*University of Chinese Academy of Science, Beijing 100049, China*

Tel.: +86 10 8254 5576. Email: [hanbh@nanoctr.cn](mailto:hanbh@nanoctr.cn)

Tel.: +86 10 8254 5708. Email: [dingxs@nanoctr.cn](mailto:dingxs@nanoctr.cn)

## Supplementary Figures

### Section 1. Chemical structures of typical POPs for hydrogen evolution reaction

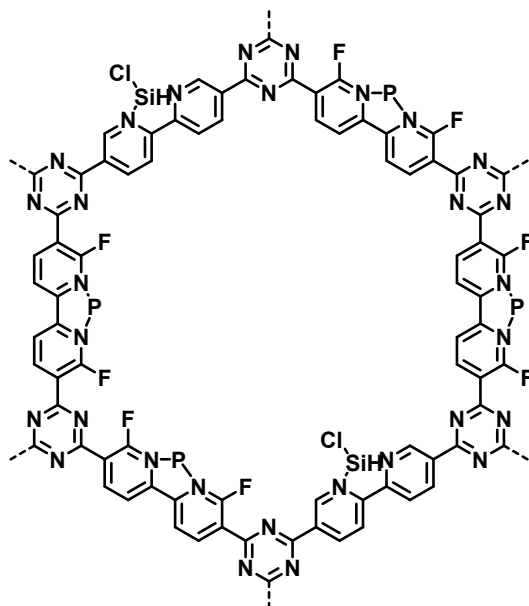

**Fig. S1** Chemical structure of SiPF-Bpy-CTF.

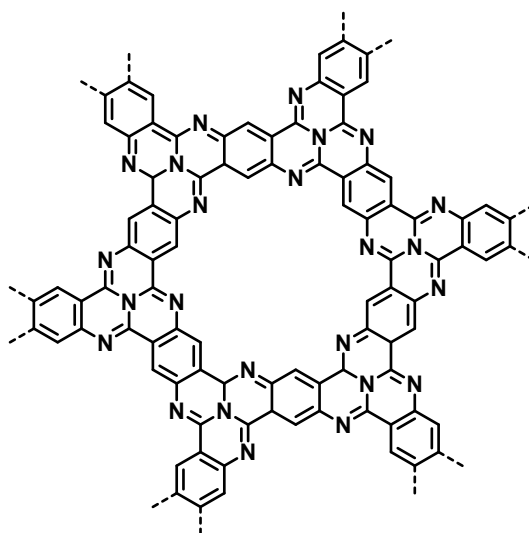

**Fig. S2** Chemical structure of TQ-CQN.

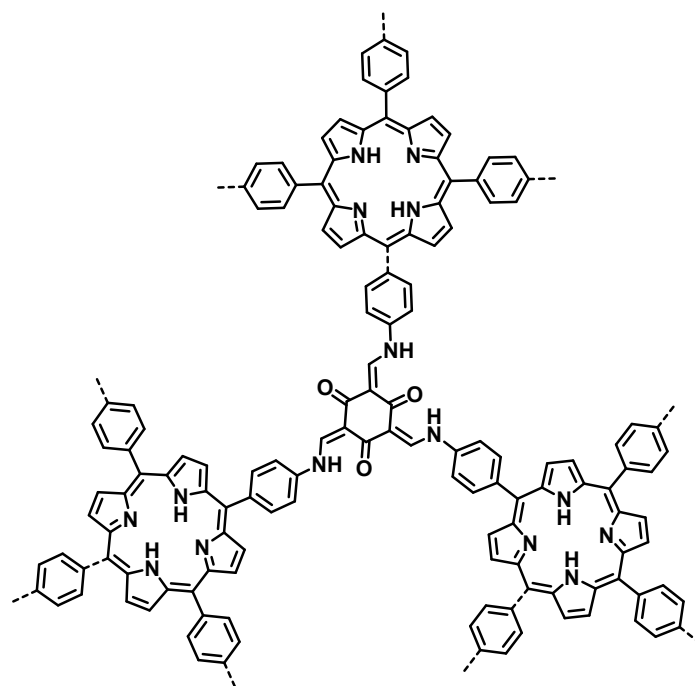

**Fig. S3** Chemical structure of TpPAM.

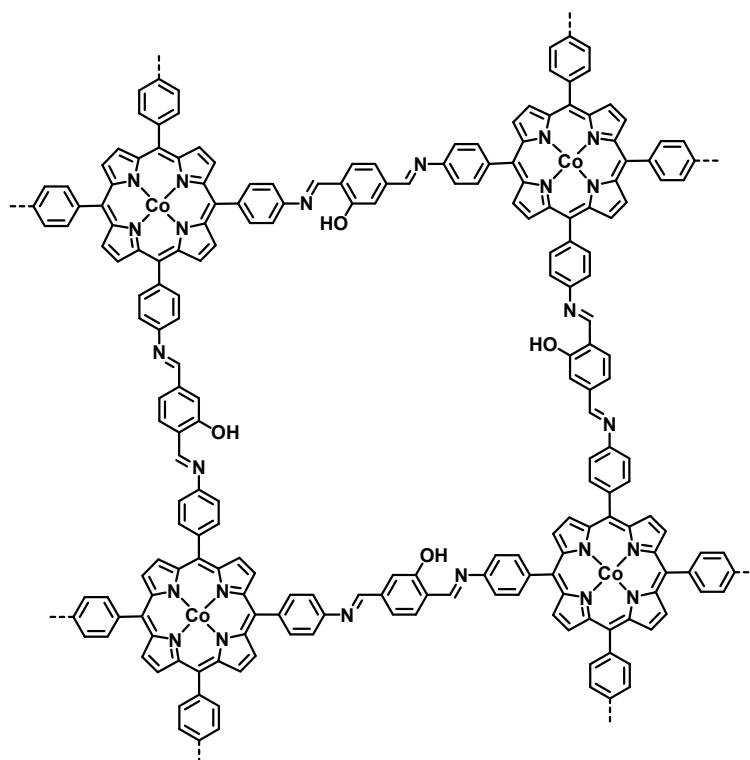

**Fig. S4** Chemical structure of CoCOP.

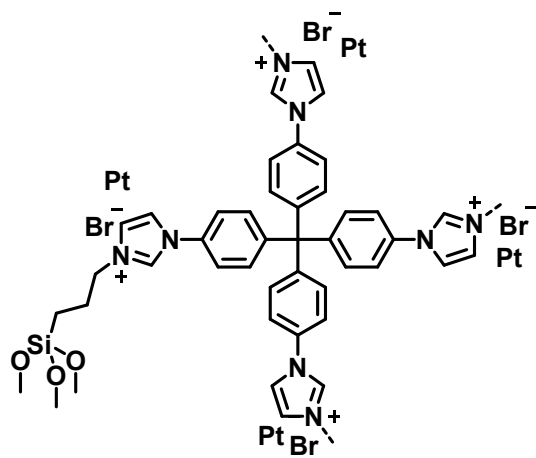

**Fig. S5** Chemical structure of imidazolium-based POP with Pt on GCE.

## Section 2. Chemical structures of typical POPs for oxygen evolution reaction

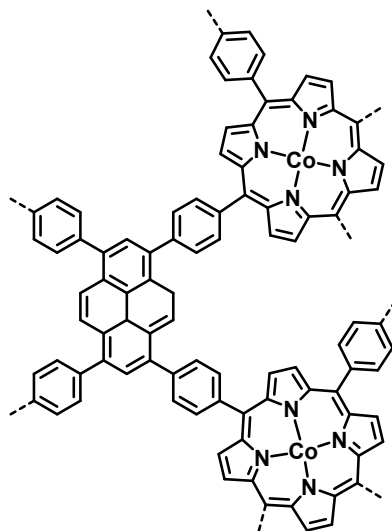

**Fig. S6** Chemical structure of Co-MPPy-1.

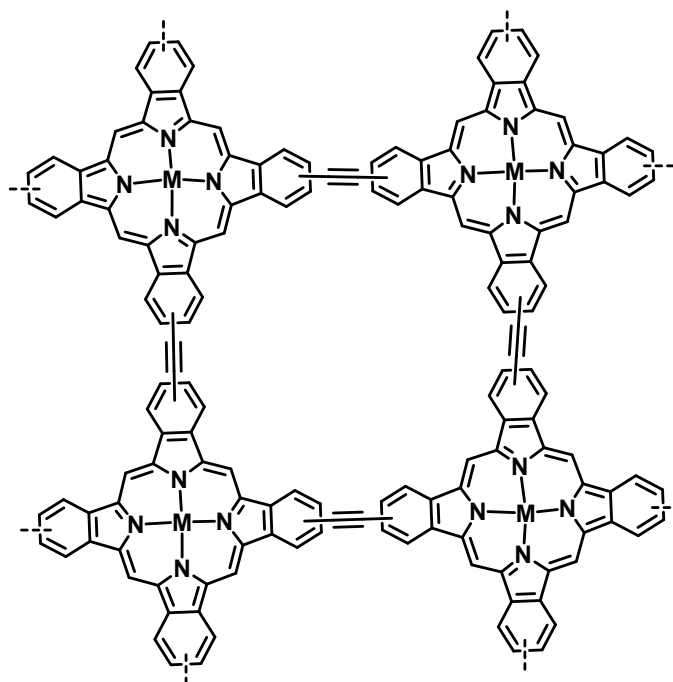

**Fig. S7** Chemical structure of Fe<sub>0.5</sub>Ni<sub>0.5</sub>Pc-CP (M = Fe<sub>0.5</sub>Ni<sub>0.5</sub>).

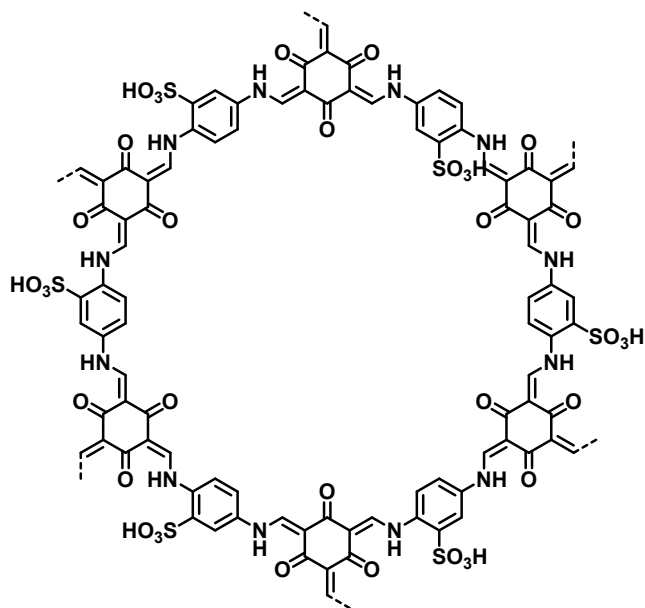

**Fig. S8** Chemical structure of COF-SO<sub>3</sub>H.

### Section 3. Chemical structures of typical POPs for oxygen reduction reaction

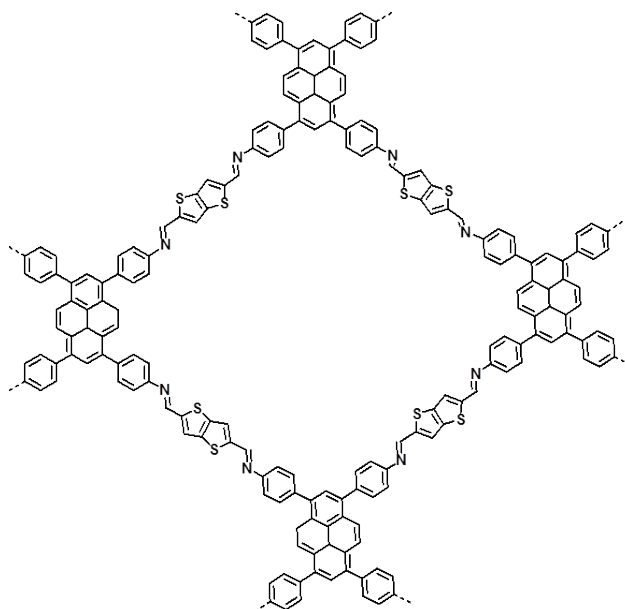

**Fig. S9** Chemical structure of thienothiophene-pyrene COF.

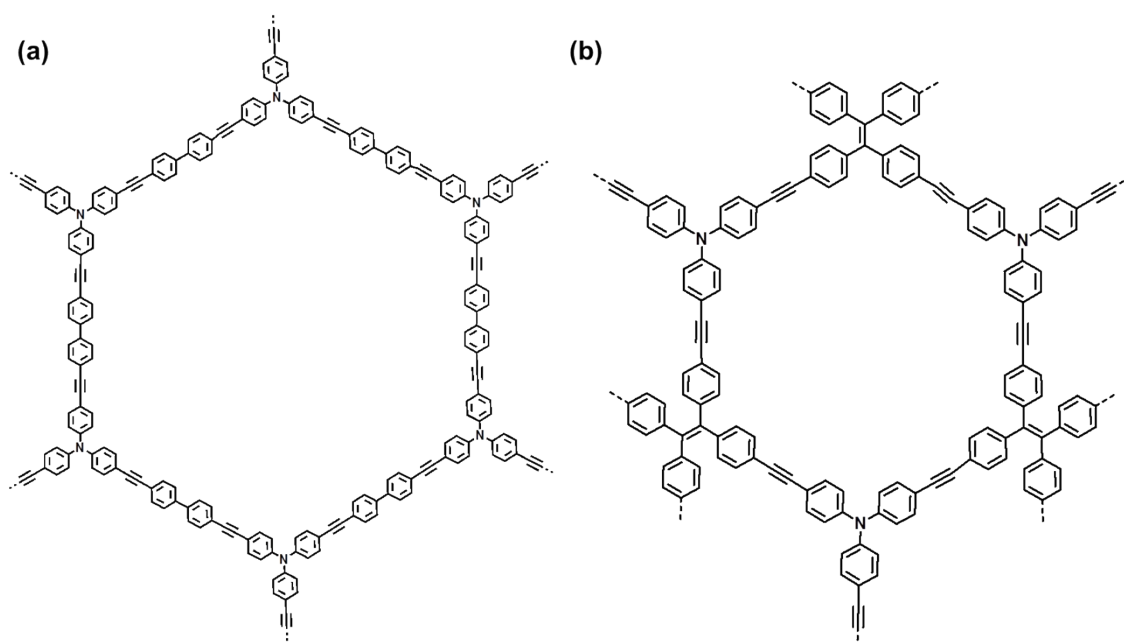

**Fig. S10** Chemical structures of two electrochemically active CMPs.

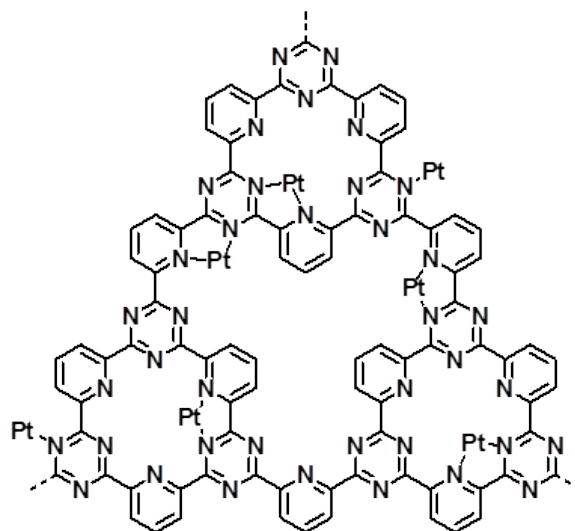

**Fig. S11** Chemical structure of Pt-modified CTF.

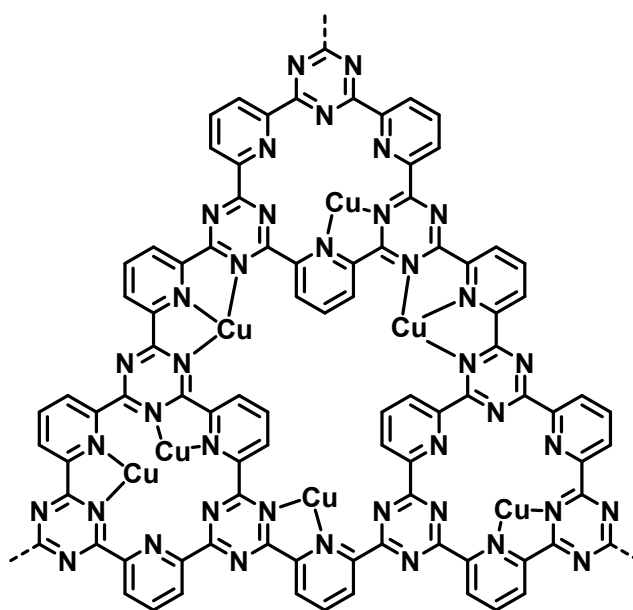

**Fig. S12** Chemical structure of copper-modified CTF.



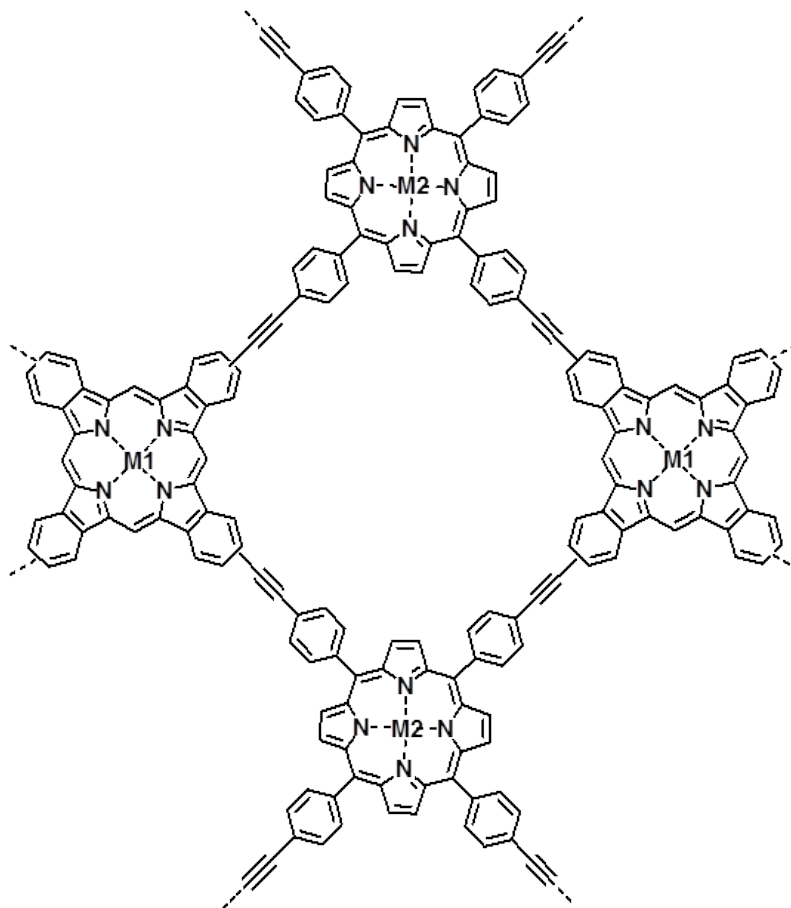

**Fig. S13** Chemical structure of mixed phthalocyanine-porphyrin-based CMP (FePcZnPor-CMP: M1 = Fe, M2 = Zn; ZnPcFePor-CMP: M1 = Zn, M2 = Fe; FePcFePor-CMP: M1 = M2 = Fe; and ZnPcZnPor-CMP: M1 = M2 = Zn).

#### Section 4. Chemical structures of typical POPs for CO<sub>2</sub> reduction reaction

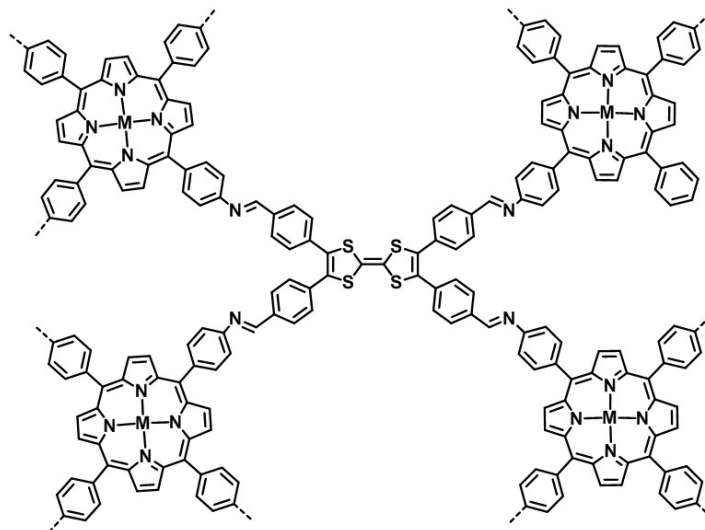

**Fig. S14** Chemical structure of metalloporphyrin-tetrathiafulvalene based COF.

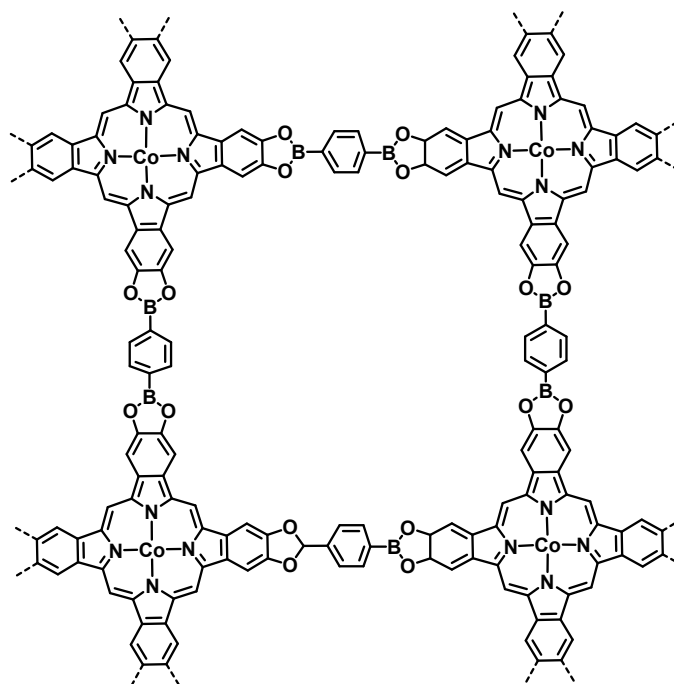

**Fig. S15** Chemical structure of Co-Pc-PBBA.

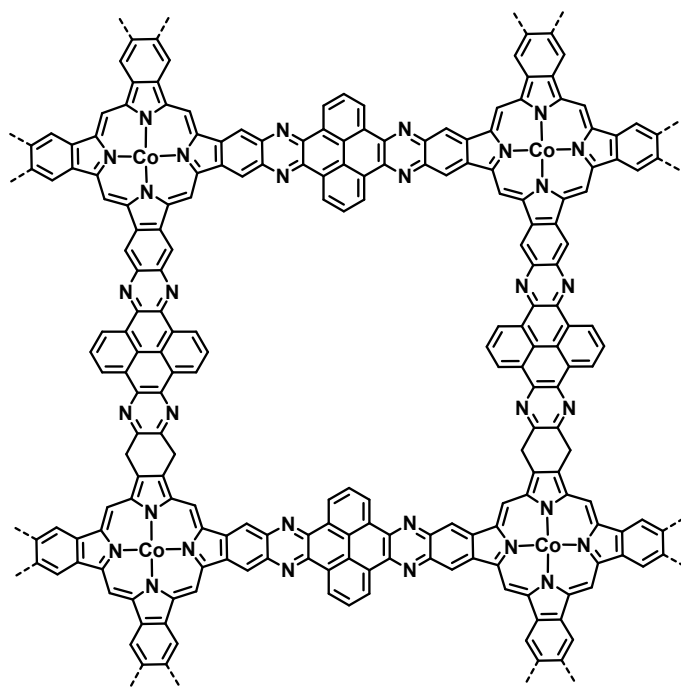

**Fig. S16** Chemical structure of CoPcPDQ-COF.

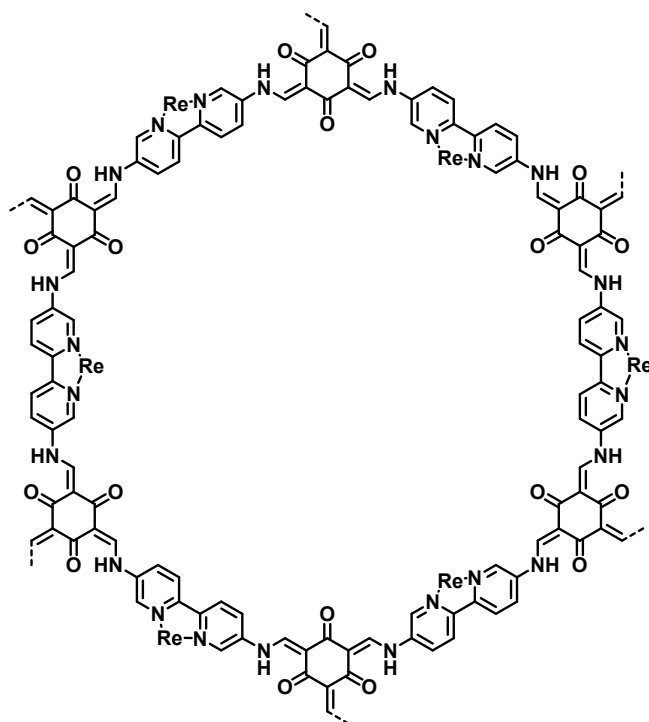

**Fig. S17** Chemical structure of Re(I) modified COF.

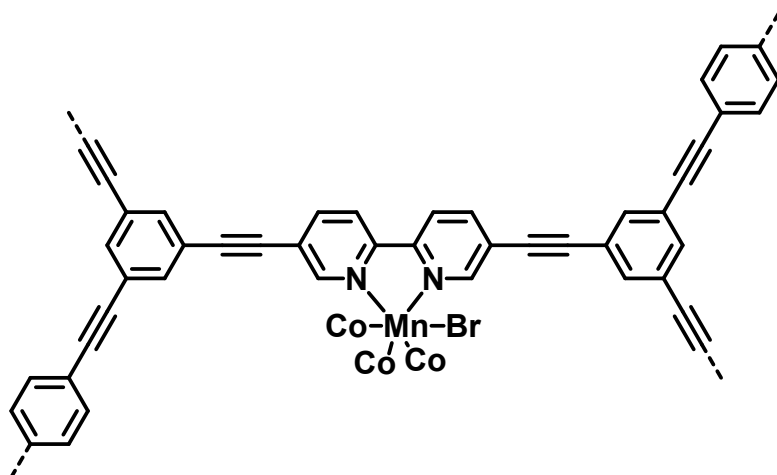

**Fig. S18** Chemical structure of Mn(CO)<sub>5</sub>Br modified CMP.

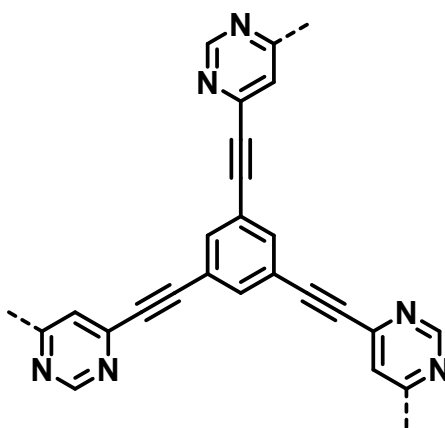

**Fig. S19** Chemical structure of PyPOP.

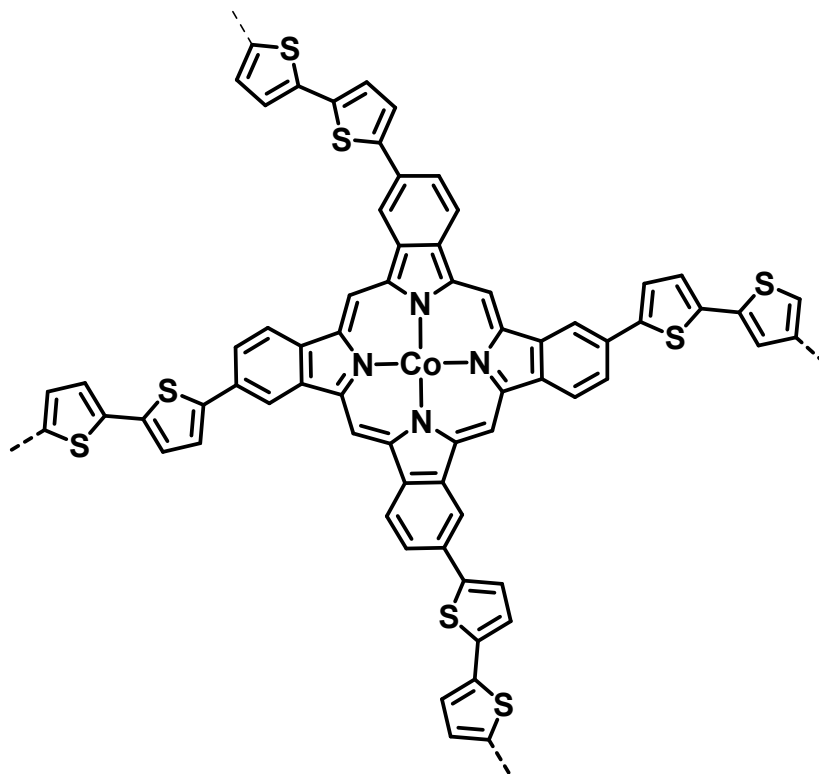

**Fig. S20** Chemical structure of p(CoPc-1).

## Section 5. Chemical structures of typical POPs for other reactions

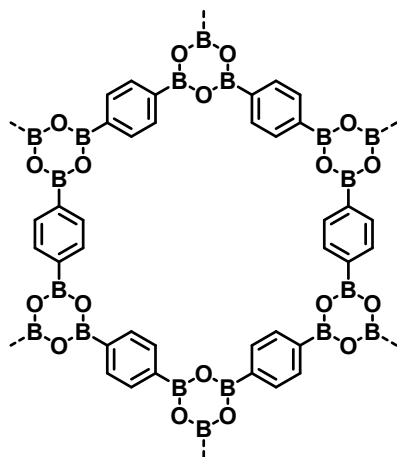

**Fig. S21** Chemical structure of B-rich COF.

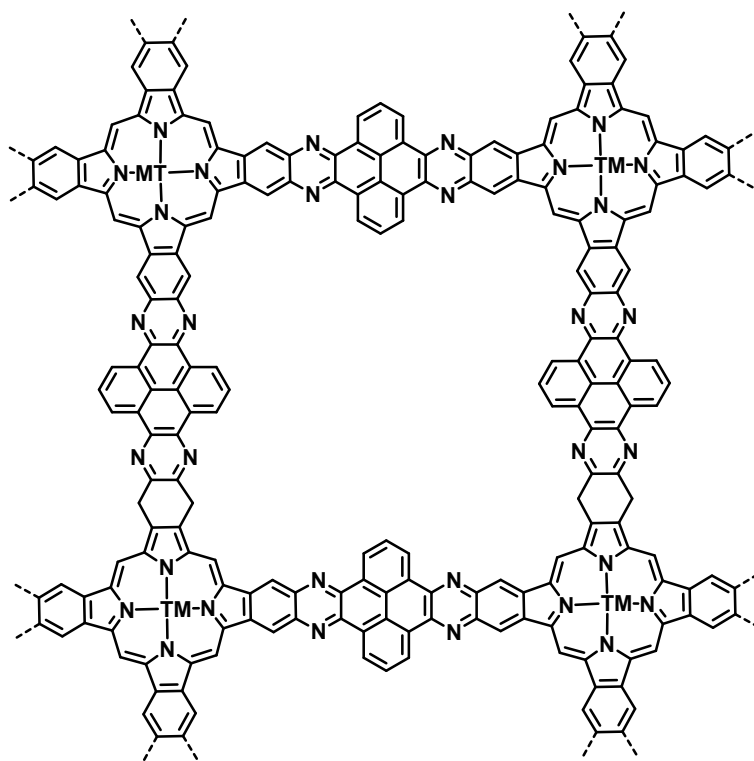

**Fig. S22** Chemical structure of conductive Mo-COF (TM = Mo).

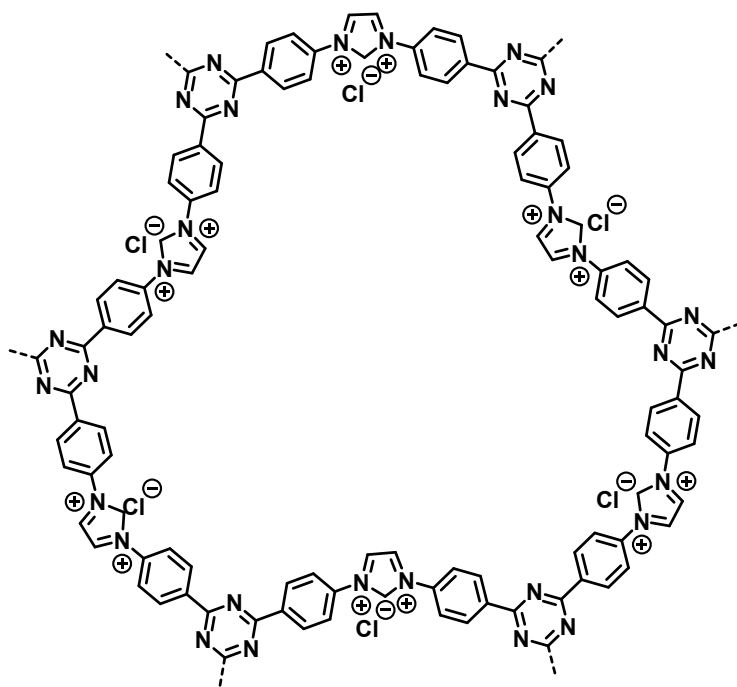

**Fig. S23** Chemical structure of the cationic CTF.
